# Supplementary material
Source: PubMed Central journal article supplement (PMC4201133)

## **Supplemental Material**

### *Drug Metabolism & Disposition*

#### **Endoxifen and Other Metabolites of Tamoxifen Inhibit Human Hydroxysteroid Sulfotransferase 2A1 (hSULT2A1)**

Edwin J. Squirewell, Xiaoyan Qin, and Michael W. Duffel\*

Division of Medicinal and Natural Products Chemistry, Department of Pharmaceutical Sciences  
and Experimental Therapeutics, College of Pharmacy, The University of Iowa, Iowa City, IA

**Supplemental Figure S1.**  $K_i$  determinations for inhibitors of the hSULT2A1-catalyzed sulfation of DHEA. The inhibitors that were used in this study were (A) Endoxifen, (B) N-desTAM, (C) 4-OHTAM, and (D) TAM-NO. Each solid line represents a single concentration of inhibitor in the presence of various substrate concentrations. Data are the means  $\pm$  standard error from triplicate determinations.

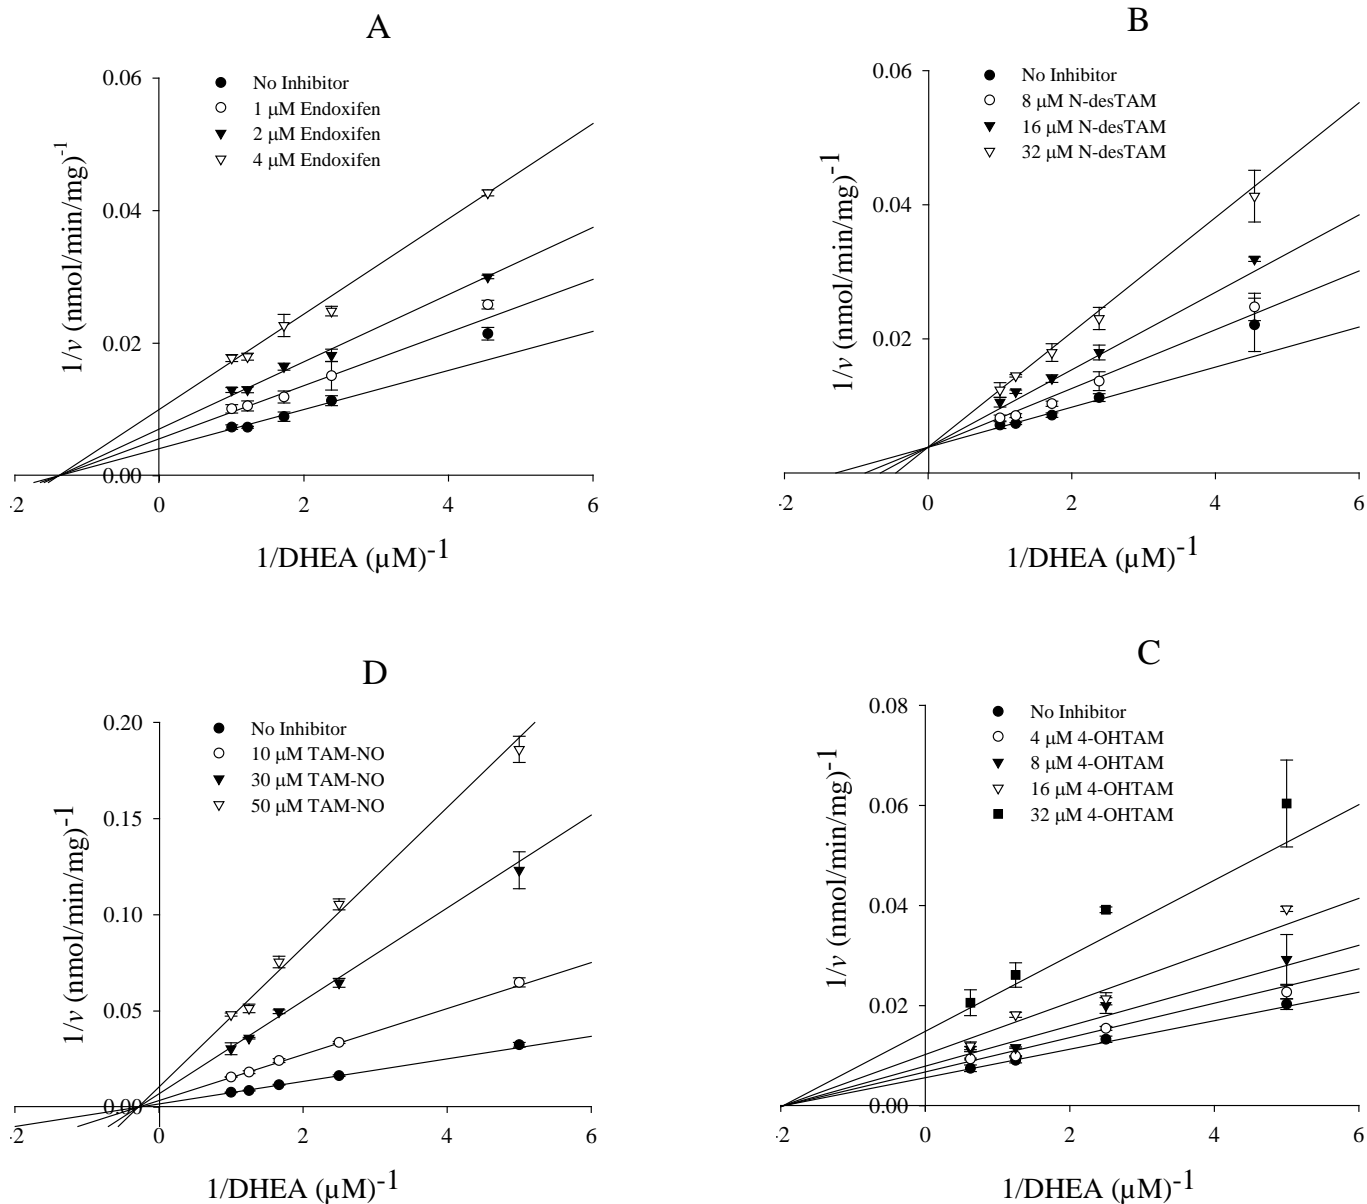

**Supplemental Figure S2.**  $K_i$  determinations for inhibitors of the hSULT2A1-catalyzed sulfation of pregnenolone. The inhibitors that were used in this study were (A) Endoxifen, (B) N-desTAM, (C) 4-OHTAM, and (D) TAM-NO. Each solid line represents a single concentration of inhibitor in the presence of various substrate concentrations. Data are the means  $\pm$  standard error from triplicate determinations.

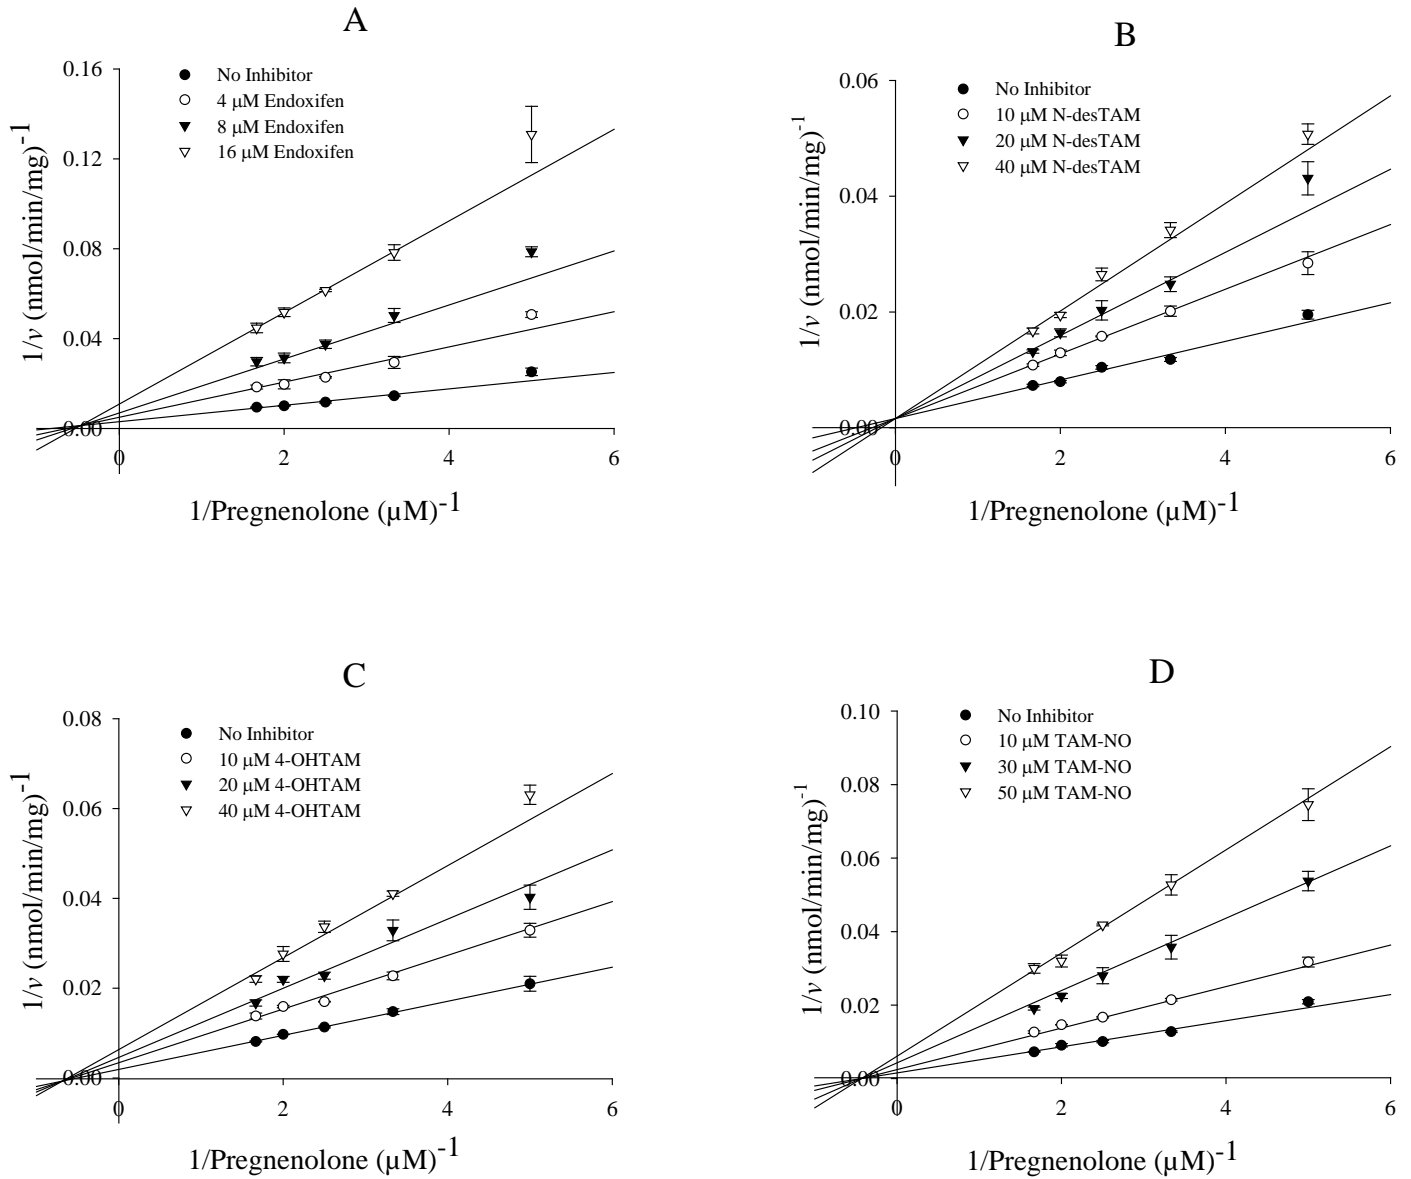

**Supplemental Figure S3.** Synthesis of N-desTAM-S. The yield for the conversion of N-desTAM to its corresponding sulfamate was 90%. (Abbreviations: THF, tetrahydrofuran; Et<sub>2</sub>O, ethyl ether; 1,2-DiMeIm, 1,2-dimethylimidazole; CH<sub>2</sub>Cl<sub>2</sub>, dichloromethane; NH<sub>4</sub>CO<sub>2</sub>H, ammonium formate; Zn, zinc; MeOH, methanol)

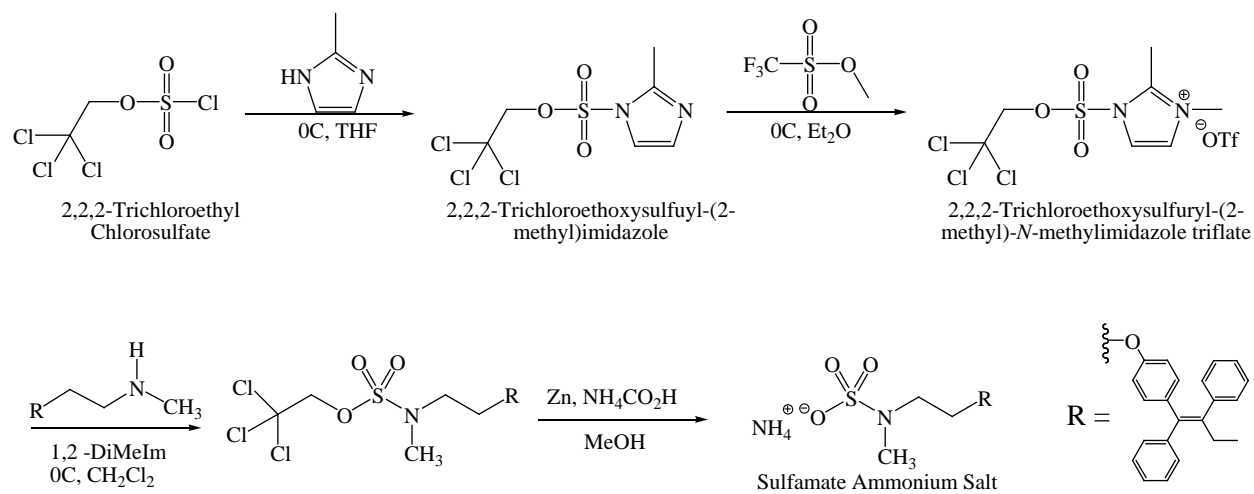

**Supplemental Figure S4.** Synthesis of 4-TAM-SO<sub>4</sub>. The yield for the conversion of 4-OHTAM to its corresponding sulfate was 91%. (Abbreviations: THF, tetrahydrofuran; Et<sub>2</sub>O, ethyl ether; 1,2-DiMeIm, 1,2-dimethylimidazole; CH<sub>2</sub>Cl<sub>2</sub>, dichloromethane; NH<sub>4</sub>CO<sub>2</sub>H, ammonium formate; Zn, zinc; MeOH, methanol)

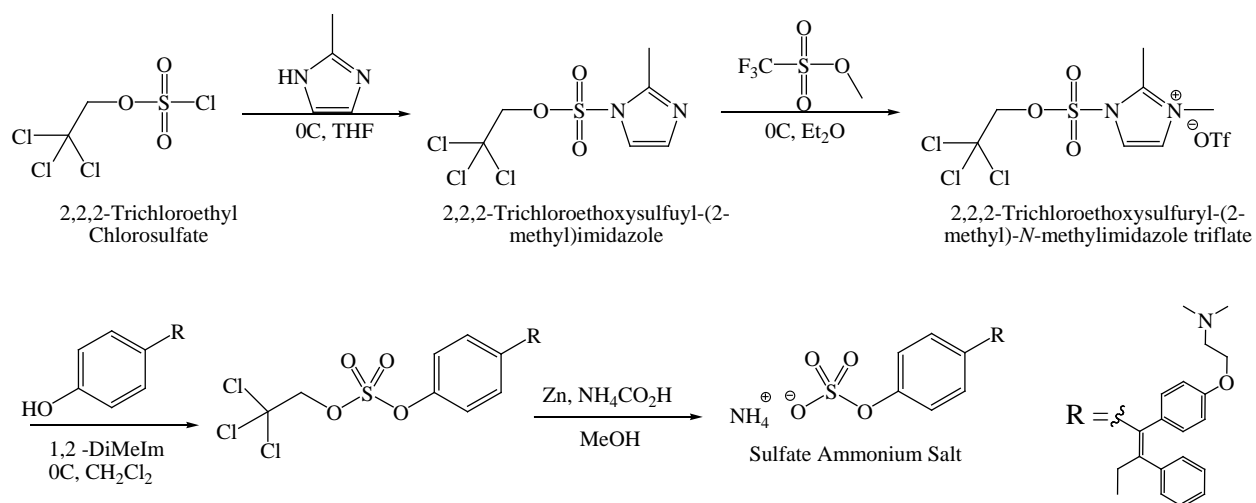

**Supplemental Figure S5.** LC-MS analysis of 4-TAM-SO<sub>4</sub> formed in a reaction catalyzed by hSULT2A1.

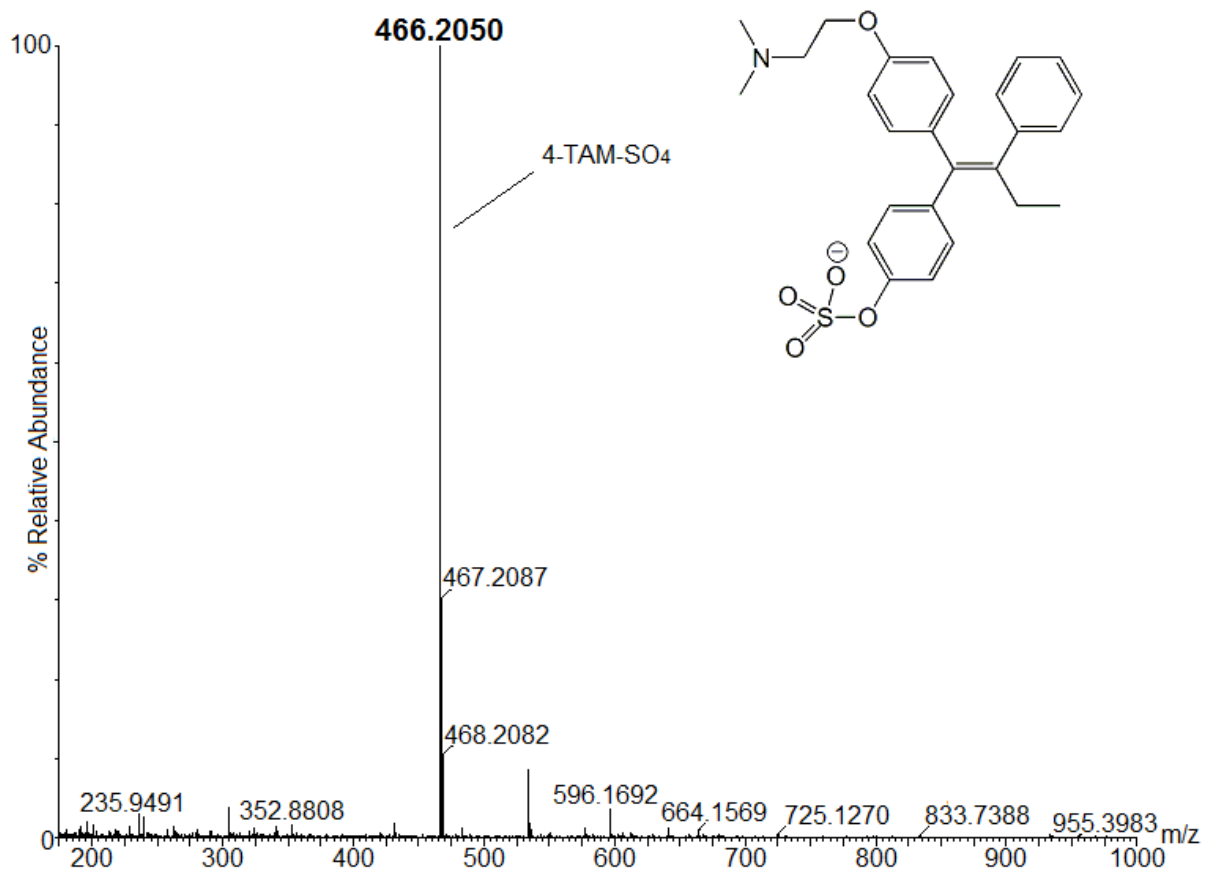

Supplement: supp_114.059709_Supplemental_Material_DMD059709.pdf [file supp_114.059709_Supplemental_Material_DMD059709.pdf]
